# Supplementary material for: Nanorod position and orientation in vertical cylinder block copolymer films
Source: Royal Society of Chemistry journal article supplement (doi:10.1039/d0sm00043d), 2020-01-01
Supplement: d0sm00043d1.pdf [file d0sm00043d1.pdf]

## Supporting Information for:

# Nanorod Position and Orientation in Vertical Cylinder Block Copolymer Films

*Boris Rasin,<sup>†</sup> Benjamin J. Lindsay,<sup>‡</sup> Xingchen Ye,<sup>§</sup> Jeffrey S. Meth,<sup>‡</sup> Christopher B. Murray,<sup>†, §</sup>  
Robert A. Riggleman,<sup>‡</sup> and Russell J. Composto<sup>\*†</sup>*

<sup>†</sup>Department of Materials Science and Engineering, University of Pennsylvania, Philadelphia, Pennsylvania 19104, United States

<sup>‡</sup>Department of Chemical and Biomolecular Engineering, University of Pennsylvania, Philadelphia, Pennsylvania 19104, United States

<sup>§</sup>Department of Chemistry, University of Pennsylvania, Philadelphia, Pennsylvania 19104, United States

<sup>‡</sup>DuPont Co., Wilmington, Delaware 19803, United States

### **Corresponding Author**

\*E-mail: [composto@seas.upenn.edu](mailto:composto@seas.upenn.edu).

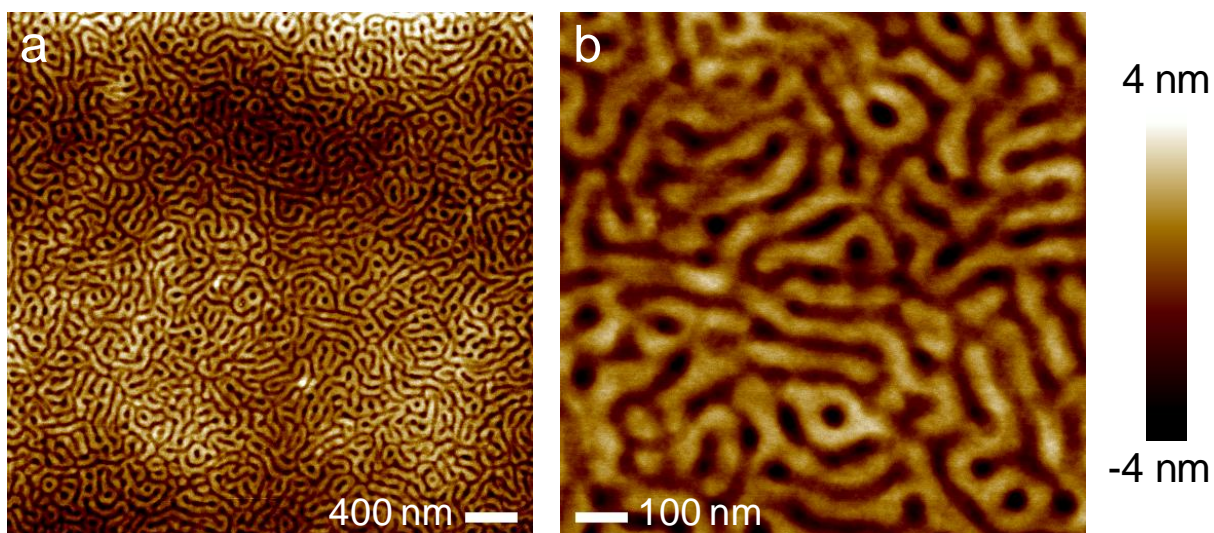

**Figure S1.** AFM topography images of neat as-spin-coated PS-*b*-P2VP films. (a) shows a 4 μm by 4 μm AFM topography image and (b) shows a 1 μm by 1 μm AFM topography image.

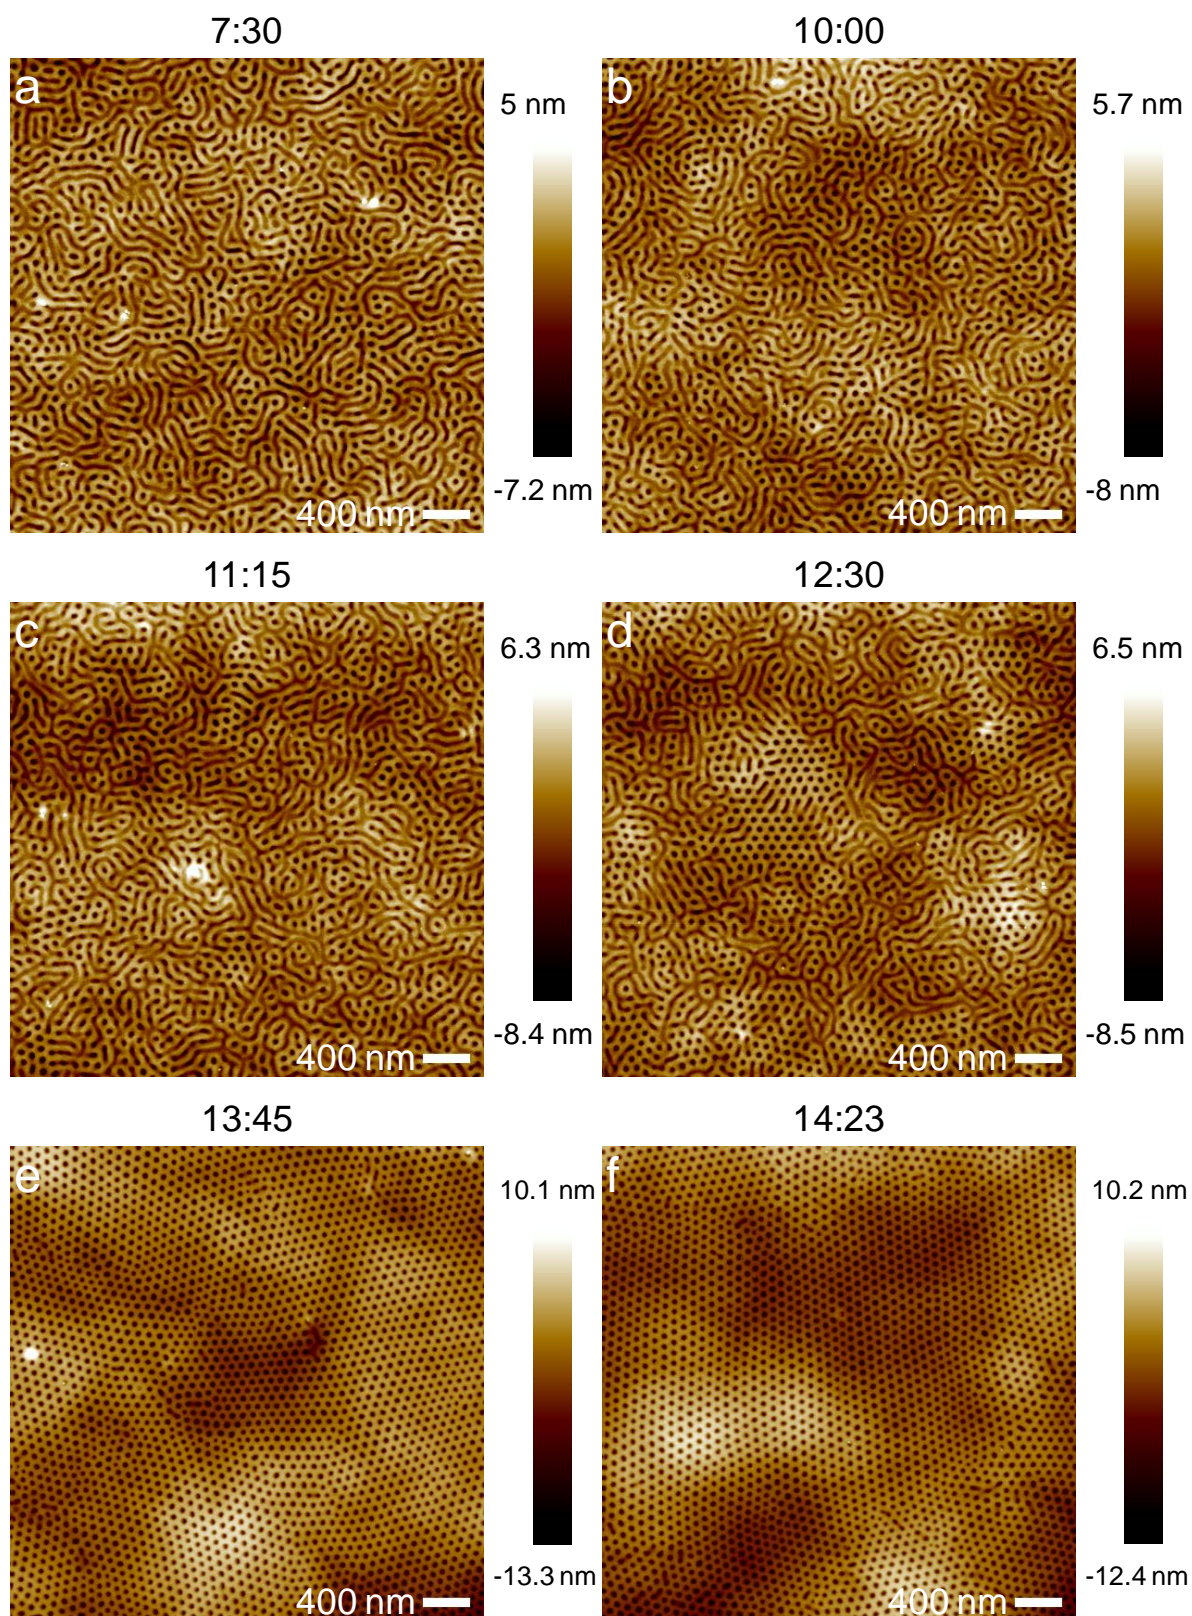

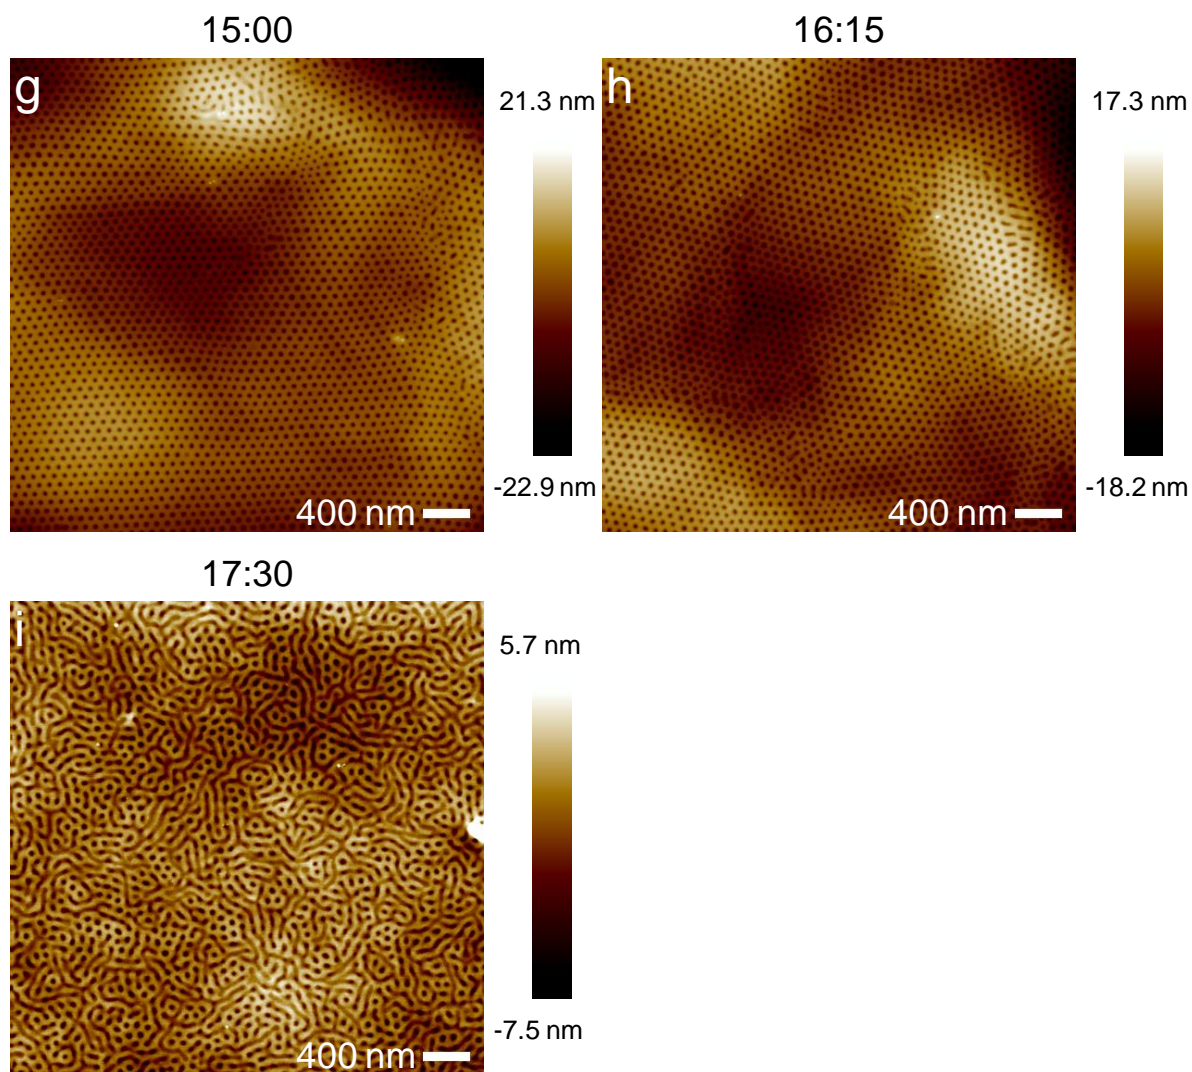

**Figure S2.** AFM topography images of neat PS-*b*-P2VP films solvent annealed in chloroform for various lengths of time. Above each AFM image the length of time the film in the image was solvent annealed is indicated in the format minutes:seconds.

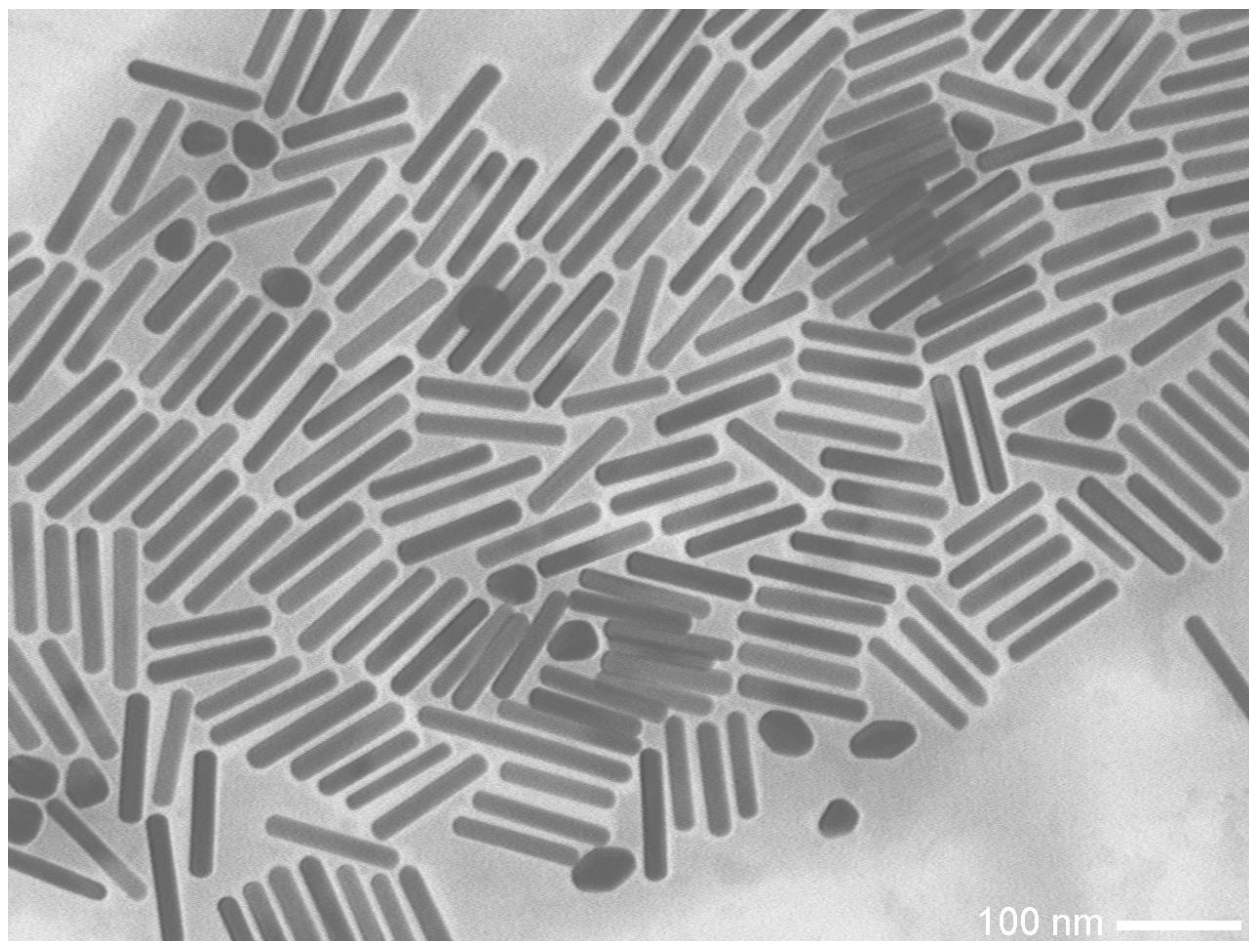

**Figure S3.** TEM image of the 101 nm length by 16 nm diameter gold nanorods.

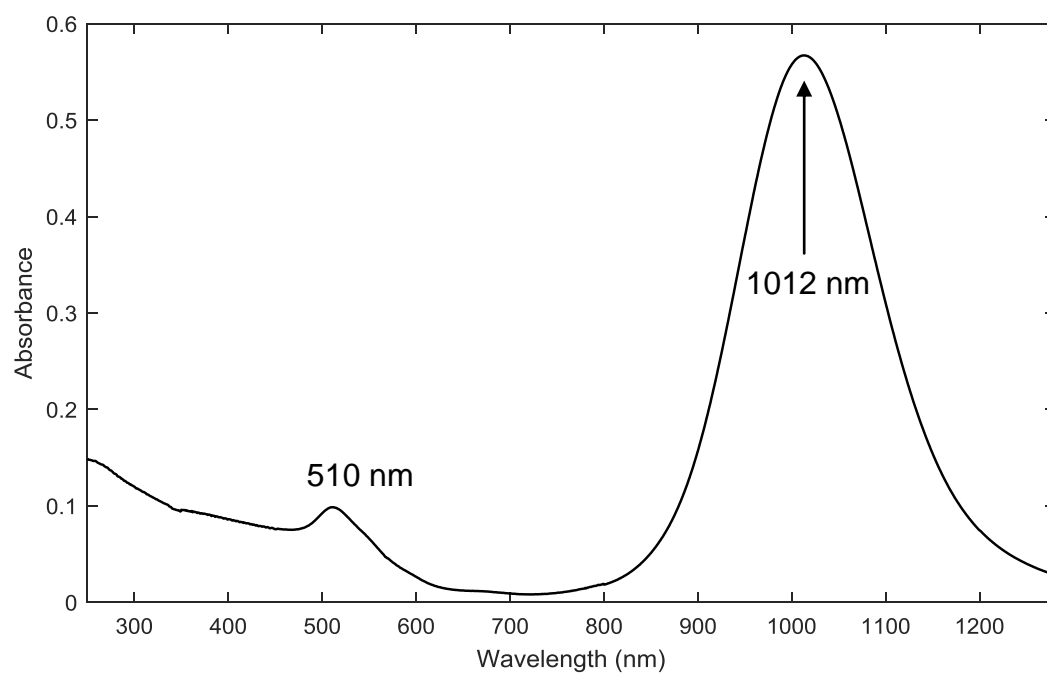

**Figure S4.** UV-vis-NIR spectrum of the 101 nm length by 16 nm diameter gold nanorods in water.

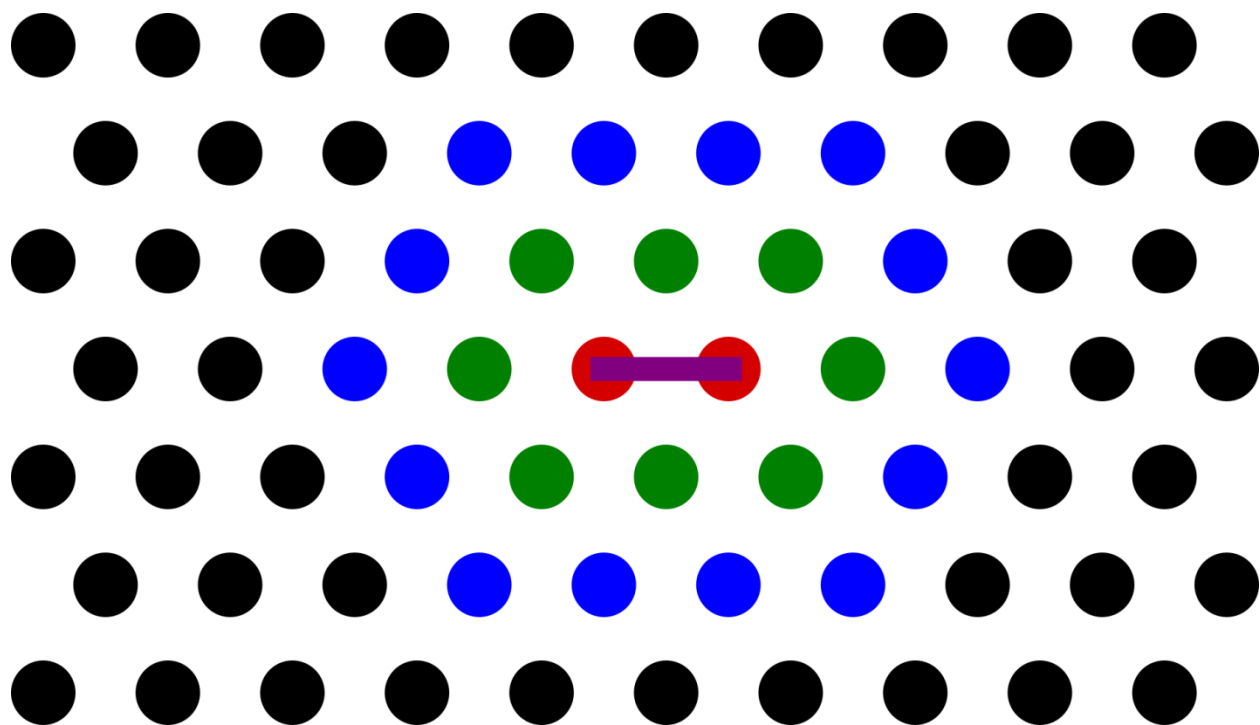

**Figure S5.** Diagram for identifying whether a gold nanorod in the bridging state is at a defect in the hexagonal lattice or is not at a defect in the hexagonal lattice.

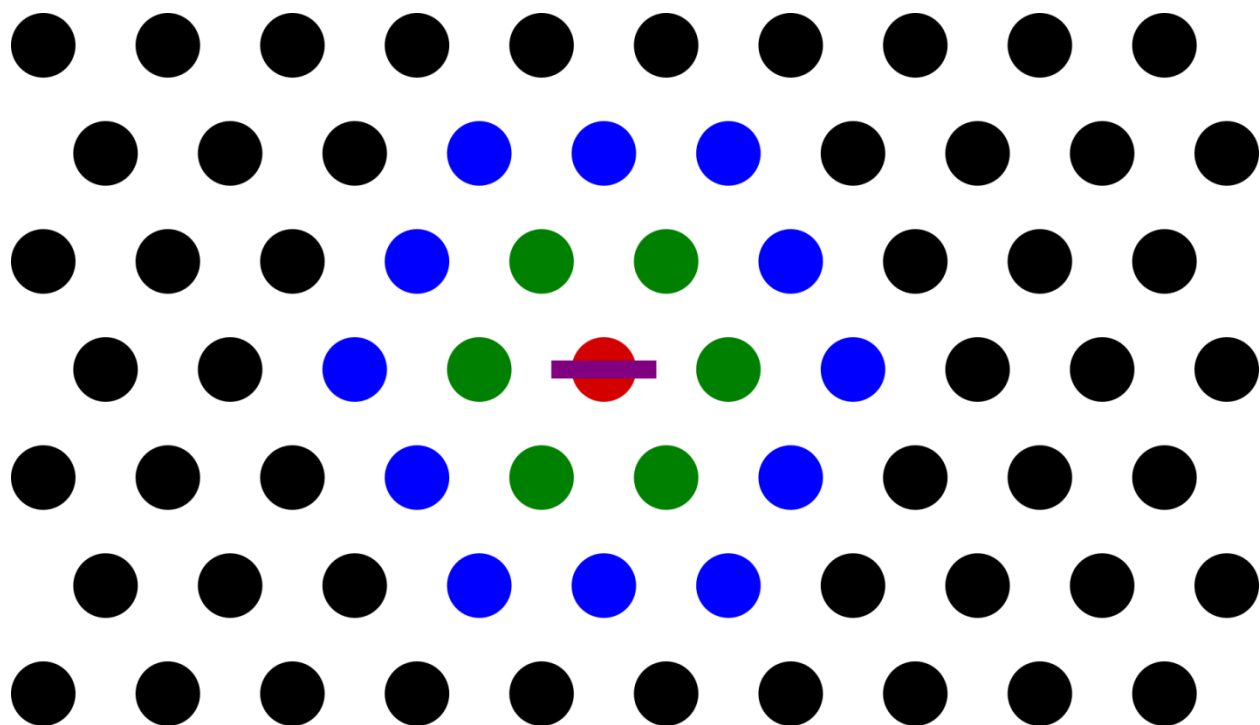

**Figure S6.** Diagram for identifying whether a gold nanorod in the centered state is at a defect in the hexagonal lattice or is not at a defect in the hexagonal lattice.

## MODEL DETAILS

Thin cylindrical AB-diblock copolymer nanocomposite films were modeled with a modified version of the Hybrid Particle-Field Theory method developed by Sides and coworkers.<sup>1</sup> The primary modifications are that nanorods are modeled with an anisotropic function<sup>2</sup>, surfaces are included as cavity functions to simulate the confinement seen in a thin film<sup>3,4</sup>, and polymer segment mass is distributed by a Gaussian smearing function<sup>2-4</sup> with standard deviation of  $0.2 R_g$ , where  $R_g$  is the ideal radius of gyration of the diblock copolymer. The diblock copolymer chains are represented as discrete Gaussian chains with  $N = N_A + N_B$  segments, where the statistical segment sizes and monomer volumes of the two blocks are assumed to be identical.

The discrete Gaussian polymer chain connectivity is modeled using the harmonic bonding potential

$$\beta U_0 = \sum_i^{n_D} \sum_j^{N-1} \frac{3 |\mathbf{r}_{i,j} - \mathbf{r}_{i,j+1}|^2}{2b^2} \quad (1)$$

where  $n_D$  is the number of diblock chains and  $b$  is the statistical size of a polymer segment. Density deviations away from the bulk density,  $\rho_0$ , are penalized using a Helfand compressibility potential, given by

$$\beta U_1 = \frac{\kappa}{2\rho_0} \int d\mathbf{r} [\hat{\rho}_+(\mathbf{r}) - \rho_0]^2 \quad (2)$$

where  $\hat{\rho}_+ = \hat{\rho}_{DA} + \hat{\rho}_{DB} + \hat{\rho}_{NR} + \hat{\rho}_W$  is the spatially varying total density and  $\kappa$  controls the strength of the density fluctuations. In the limit  $\kappa \rightarrow \infty$ , the strictly incompressible model is recovered.  $\hat{\rho}_{DA}$ ,  $\hat{\rho}_{DB}$ ,  $\hat{\rho}_{NR}$ , and  $\hat{\rho}_W$  are the microscopic densities of the A-block of the diblock chain, B-block of the diblock chain, nanorods, and confining surface, respectively. The nanorods are treated as having A-like chemistry and are described by the anisotropic function

$$\hat{\rho}_{NR}(\mathbf{r}) = \frac{\rho_0}{4} \text{erfc} \left[ \frac{|\mathbf{u} \cdot (\mathbf{r} - \mathbf{r}_c)| - L_{NR}/2}{\xi_{NR}} \right] \text{erfc} \left[ \frac{|\mathbf{u} \times (\mathbf{r} - \mathbf{r}_c)| - R_{NR}}{\xi_{NR}} \right] \quad (3)$$

where  $\mathbf{u}$  is the unit vector pointing in the long direction of the nanorod,  $\mathbf{r}_c$  is the position of the nanorod center,  $L_{NR}$  is the nanorod length,  $R_{NR}$  is the nanorod radius, and  $\xi_{NR}$  is the length scale defining the distance over which the nanorod density drops from  $\rho_0$  to 0. The confining surface is a soft wall of thickness  $T_W$  on the bottom and top of the simulation box, and is neutral to both A and B chemistries. It is described by the function

$$\hat{\rho}_W(\mathbf{r}) = \frac{\rho_0}{2} \text{erfc} \left[ \frac{\min(r_z, L_z - r_z) - T_W}{\xi_W} \right] \quad (4)$$

where  $r_z$  is the z-component of  $\mathbf{r}$ ,  $L_z$  is the box size in the z-dimension, and  $\xi_w$  is the length scale over which the surface drops from a density of  $\rho_0$  to a density of 0. A and B components are assumed to interact through a purely repulsive, Flory-like contact potential given by

$$\beta U_2 = \frac{\chi}{\rho_0} \int d\mathbf{r} [\hat{\rho}_{DA}(\mathbf{r}) + \hat{\rho}_{NR}(\mathbf{r})] \hat{\rho}_{DB}(\mathbf{r}) \quad (5)$$

where the Flory parameter  $\chi$  quantifies the magnitude of incompatibility between A and B components.

We assume that the mass of each polymer segment maintains a Gaussian distribution about its center, such that  $\hat{\rho}_K(\mathbf{r})$ , the microscopic density of polymer segment type  $K$ , is given by

$$\hat{\rho}_K(\mathbf{r}) = \int d\mathbf{r}' h(\mathbf{r} - \mathbf{r}') \hat{\rho}_{K,c}(\mathbf{r}') = (h * \hat{\rho}_{K,c})(\mathbf{r}) \quad (6)$$

where  $\hat{\rho}_{K,c}(\mathbf{r})$  is the distribution of polymer segment centers given by

$$\hat{\rho}_{K,c}(\mathbf{r}) = \sum_i^{n_K} \sum_j^{N_K} \delta(\mathbf{r} - \mathbf{r}_{i,j}), \quad (7)$$

$h(\mathbf{r})$  is the Gaussian smearing function given by

$$h(\mathbf{r}) = \left( \frac{1}{2\pi a^2} \right)^{3/2} e^{-|\mathbf{r}|^2/2a^2} \quad (8)$$

where  $a$  is the smearing length scale ( $0.2 R_g$  in this work), and the last expression in Equation 6 introduces our shorthand notation for a convolution integral.

By employing a standard Hubbard-Stratonovich particle-to-field transformation, we arrive at a partition function

$$\mathcal{Z} = z_1 \int \mathcal{D}\{w\} e^{\mathcal{H}[\{w\}]} \quad (9)$$

where  $z_1$  is a numerical prefactor containing the thermal de Broglie wavelengths and normalization constants from the Gaussian functional integrals used to decouple the particle interactions, and  $\mathcal{H}$  is the effective Hamiltonian given by

$$\begin{aligned} \mathcal{H}[\{w\}] = & \frac{\rho_0}{2\kappa} \int d\mathbf{r} w_+(\mathbf{r})^2 - i\rho_0 \int d\mathbf{r} w_+(\mathbf{r}) - \int d\mathbf{r} w_A(\mathbf{r}) \hat{\rho}_{NR} \\ & + \frac{\rho_0}{\chi} \int d\mathbf{r} \left[ w_{AB}^{(+)}(\mathbf{r})^2 + w_{AB}^{(-)}(\mathbf{r})^2 \right] - n_D \ln Q_D[\mu_A, \mu_B] \end{aligned} \quad (10)$$

Here,  $\{w\}$  represents the set of chemical potential fields  $w_{AB}^{(+)}(\mathbf{r})$ ,  $w_{AB}^{(-)}(\mathbf{r})$ , and  $w_+(\mathbf{r})$ ;  $\mu_A$  and  $\mu_B$  are defined by  $\mu_K = (h * w_K)(\mathbf{r})$  where

$$w_A = i \left( w_+ + w_{AB}^{(+)} \right) - w_{AB}^{(-)}, \quad (11)$$

$$w_B = i \left( w_+ + w_{AB}^{(+)} \right) + w_{AB}^{(-)}, \quad (12)$$

$Q_D$  is the partition functions for a single diblock chain.  $Q_D$  is calculated iteratively from the chain propagator  $q(j, \mathbf{r})$ ,

$$Q_D[\mu_A, \mu_B] = \frac{1}{V} \int d\mathbf{r} q(P, \mathbf{r}) \quad (13)$$

with the chain propagator constructed using a Chapman-Kolmogorov equation

$$q(j+1, \mathbf{r}) = e^{-\mu_K(\mathbf{r})} \int d\mathbf{r}' \Phi(\mathbf{r} - \mathbf{r}') q(j, \mathbf{r}') \quad (14)$$

where  $K$  is either  $A$  or  $B$  depending on the type of segment  $j+1$  and  $\Phi(\mathbf{r} - \mathbf{r}')$  is the normalized bond transition probability.

The set of mean-field equations describing this system can be written as

$$\frac{\partial \mathcal{H}}{\partial w_K} = 0 \quad (15)$$

where  $w_K$  represents any field  $w_+$ ,  $w_{AB}^{(+)}$ , or  $w_{AB}^{(-)}$ . To compute mean-field solutions, we evolve the fields according to

$$\left( \frac{\partial w_K(\mathbf{r})}{\partial t} \right) = -\lambda_K \left( \frac{\partial \mathcal{H}}{\partial w_K(\mathbf{r})} \right) \quad (16)$$

where  $\lambda_K$  is the relaxation coefficient for field  $w_K$  and  $t$  is a fictitious time. We use a first-order semi-implicit scheme<sup>5</sup> to numerically evolve the fields. For each free energy calculation, the vertical distance between the nanorod and the surface played a significant role in the resulting free energy since the interfaces are “soft”, in that the surfaces of each are essentially a smoothed step function. In order to prevent this effect from dominating the free energy, the vertical position of the rod relative to the surface was chosen to minimize the free energy using Brent’s method in each simulation. Figure S7 shows the free energy calculations for all 3 nanorod sizes tested.

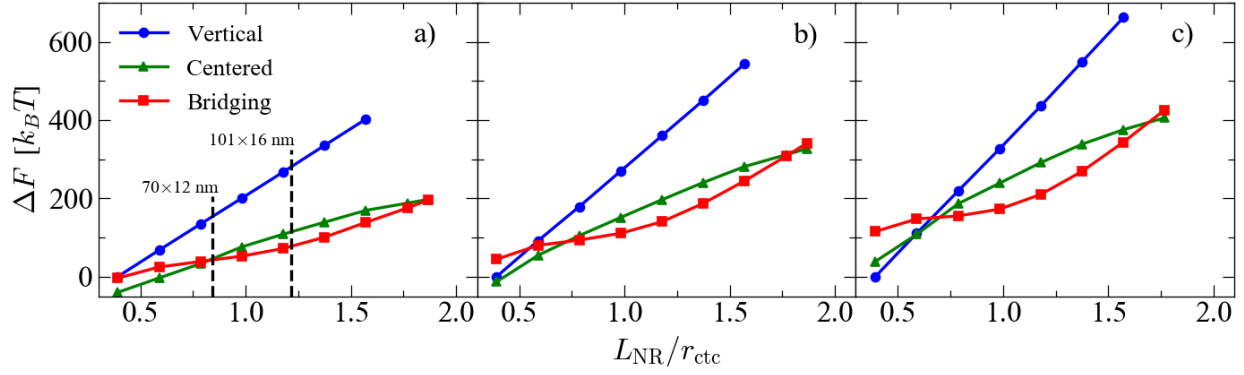

**Figure S7.** Mean-field free energy differences for nanorods in different configurations as a function of nanorod length for nanorods of diameter a)  $1.0 R_g$ , b)  $1.5 R_g$ , and c)  $2.0 R_g$ . The nanorod length in the x-axis is normalized by the cylindrical domain nearest neighbor center-to-center distance,  $r_{ctc}$ . Free energy differences in each plot are calculated relative to the free energy of a rod of the same diameter in the vertical configuration with a length of  $2 R_g$ , the shortest length in each case. The positions of the  $101 \times 16$  nm and  $70 \times 12$  nm rods used in experiments are marked in a) to show roughly where the experimental nanorod sizes fit into these calculations.

## REFERENCES

- <sup>1</sup>S. W. Sides, B. J. Kim, E. J. Kramer, and G. H. Fredrickson, *Physical Review Letters* **96**, 250601 (2006).
- <sup>2</sup>J. Koski, H. Chao, and R. A. Riggleman, *Journal of Chemical Physics* **139**, 244911 (2013).
- <sup>3</sup>H. Chao, B. A. Hagberg, and R. A. Riggleman, *Soft Matter* **10**, 8083 (2014).
- <sup>4</sup>J. Koski, H. Chao, and R. A. Riggleman, *Chem. Commun.* **51**, 5440 (2015).
- <sup>5</sup>E. M. Lennon, G. O. Mohler, H. D. Cenicerros, C. J. García-Cervera, and G. H. Fredrickson, *Multiscale Modeling and Simulation* **6**, 1347 (2008).
